# Supplementary material
Source: PubMed Central journal article supplement (PMC2888387)
Supplement: supp_M110.114520_jbc.M110.114520-1.pdf [file supp_M110.114520_jbc.M110.114520-1.pdf]

## Supplemental Tables

**Table S1: Primers used for PCR (Molecular constructs for *AdoMetT1* gene transfection and replacement)**

Restriction sites are underlined. Start and stop codons and anticodons are in bold.

| N° | Sequence                                           |
|----|----------------------------------------------------|
| 1  | 5'-TTCTAGAAAGCCCAGAAATGGCGAAGGGT-3'                |
| 2  | 5'-AAGCTTGCCTAGACCTTCTCTCGCGT-3'                   |
| 3  | 5'-GGATCCAGCCCAGAAATGGCGAAG-3'                     |
| 4  | 5'-CAATCCTCTAGAGACCTTCTCTCGCGTCG-3'                |
| 5  | 5'-ACGAGCAAGGCTAGTGGTGT-3'                         |
| 6  | 5'-GCAATCCATCTTGTTCATCATGGGAGGGAGAGGAGAAGAGA-3'    |
| 7  | 5'-CCTTCTTGACGAGTTCTTCTGAATTGGTCCGAGCTTCTTCA-3'    |
| 8  | 5'-ACAGCTAATGCCCCAGCTC-3'                          |
| 9  | 5'-TCTCTTCTCCTCTCCCTCCCATGATTGAACAAGATGGATTGC-3'   |
| 10 | 5'-TGAAGAAGCTCGGAACCAATTCAGAAGAAGTTCGTCGAAGAAGG-3' |
| 11 | 5'-CGGCACTGGTCAACTTGGCCATGGGAGGGAGAGGAGAAGAG-3'    |
| 12 | 5'-GAGCAGGACTGACCGATTGGTCCGAGCTTCTTCAT-3'          |
| 13 | 5'-CTCTTCTCCTCTCCCTCCCATGGCCAAGTTGACCAGTGCCG-3'    |
| 14 | 5'-ATGAAGAAGCTCGGAACCAATCGGTCAGTCCTGCTC-3'         |

**Table S2: Primers and Taqman probes (TP) used for real-time PCR.**

| Gene name                     | Products                                 | Sequence |                             | Amplicon length (bp) |
|-------------------------------|------------------------------------------|----------|-----------------------------|----------------------|
| LinJ10_V3.0370                | AdoMetT1                                 | FW       | CCATGTACATCTGGGGTGCG        | 165                  |
|                               |                                          | RV       | GAGACGCGGAAGTCGAGC          |                      |
|                               |                                          | TP       | CCTGTGCCCTCGTGGCTCGGAGA     |                      |
| LmjF10.0360                   | AdoMetT1                                 | FW       | GCCATGTACATTTGGGGTGCG       | 165                  |
|                               |                                          | RV       | GGACGCGGAAGTCGAGCGT         |                      |
|                               |                                          | TP       | CCTGTGCCCTCGTGGCTCGGAGA     |                      |
| <i>L. infantum</i> GAPDH      | Glyceraldehyde-3-phosphate dehydrogenase | FW       | AAGGAGAACTTCGGCATCGAGACTG   | 255                  |
|                               |                                          | RV       | CGCGCGGAACGTCAGGTC          |                      |
|                               |                                          | TP       | TGACCACCATCCACTCCTACACGGCGA |                      |
| <i>L. major</i> GAPDH         | Glyceraldehyde-3-phosphate dehydrogenase | FW       | CAAAGGAGAACTTCGGCATCGAGAC   | 257                  |
|                               |                                          | RV       | CGAGCGGAACGTCAGGTC          |                      |
|                               |                                          | TP       | TGACCACCATCCACTCCTACACGGCGA |                      |
| LinJ04_V3.1250<br>LmjF04.1230 | Actin                                    | FW       | GCTGTACGGGAACATCGTGCTG      | 118                  |
|                               |                                          | RV       | CGCAACCACCTTCGGCTTTATC      |                      |

FW, forward primer; RV, reverse primer; TP, TaqMan probe dual-labeled with 5'FAM /3'BHQ for the *AdoMetT1* gene and 5'TET /3'BHQ for GAPDH. Note that the Taqman probes were the same in *L. infantum* and *L. major*.
